# Supplementary material
Source: PubMed Central journal article supplement (PMC3431682)

## Supplemental Data

Reverse Structural Genomics: An Unusual Flavin Binding Site in a Putative Protease from  
*Bacteroides thetaiotaomicron*.

**Tanja Knaus, Elisabeth Eger, Julia Koop, Steve Stipsits, Cynthia L. Kinsland, Steven E.  
Ealick, and Peter Macheroux**

### Table of Contents

|                                                                                                                          |    |
|--------------------------------------------------------------------------------------------------------------------------|----|
| Supplementar Figure 1:<br>Chemical structures of naturally occurring flavins and chemically modified flavin analogs..... | S2 |
| Supplementary Figure 2:<br>SDS-PAGE of ppBat purification using Ni-NTA affinity chromatography.....                      | S3 |
| Supplementary Figure 3:<br>UV/vis absorbance difference titration of 1-deaza-riboflavin (41 $\mu$ M) with ppBat.....     | S4 |
| Supplementary Figure 4:<br>UV/vis absorbance difference titration of 2'-deoxy-riboflavin with ppBat.....                 | S5 |
| Supplementary Figure 5:<br>ITC-determination of the dissociation constant for 2'-deoxy-riboflavin.....                   | S6 |
| Supplementary Figure 6:<br>Size exclusion chromatography of ppBat and Trp164 variants.....                               | S7 |

## Supplementary Figure 1

Chemical structures of naturally occurring flavins (panel A) and chemically modified flavin analogs (panel B).

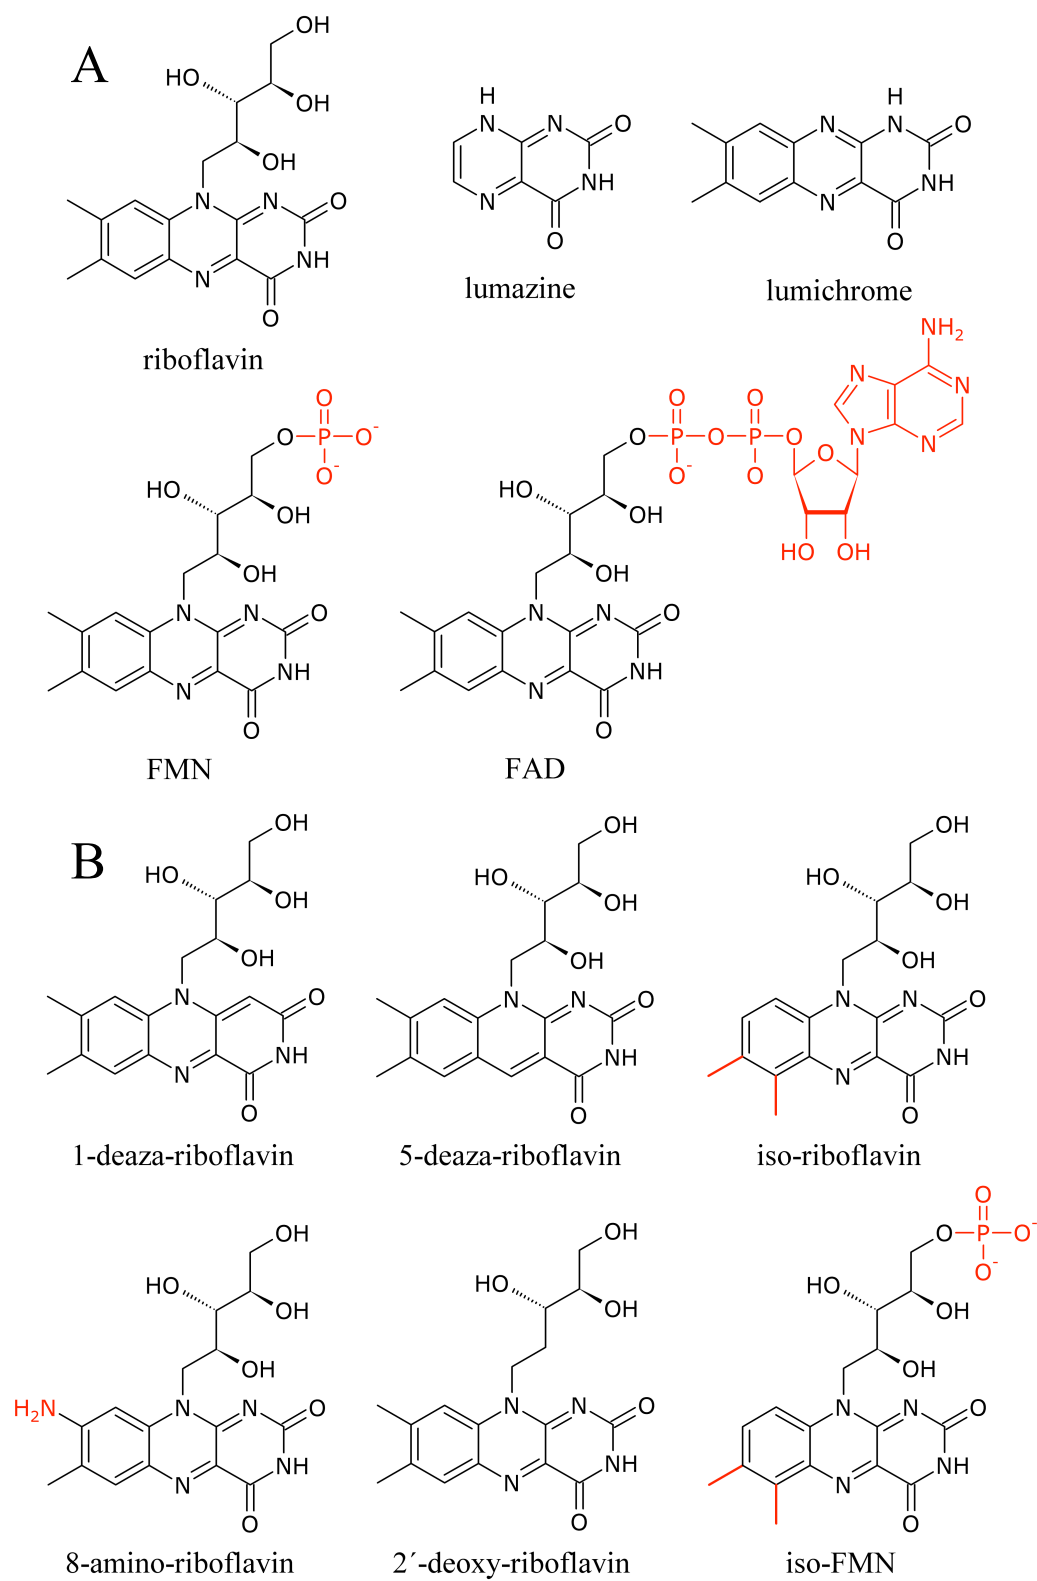

**Supplementary Figure 2**

SDS-PAGE of ppBat purification using Ni-NTA affinity chromatography. Lane 1: molecular mass standard, lane 2: crude extract, lane 3: cell pellet after sonification and centrifugation, lane 4: supernatant, lane 5: flow through, lane 6: washing fraction, lane 7: pooled ppBat.

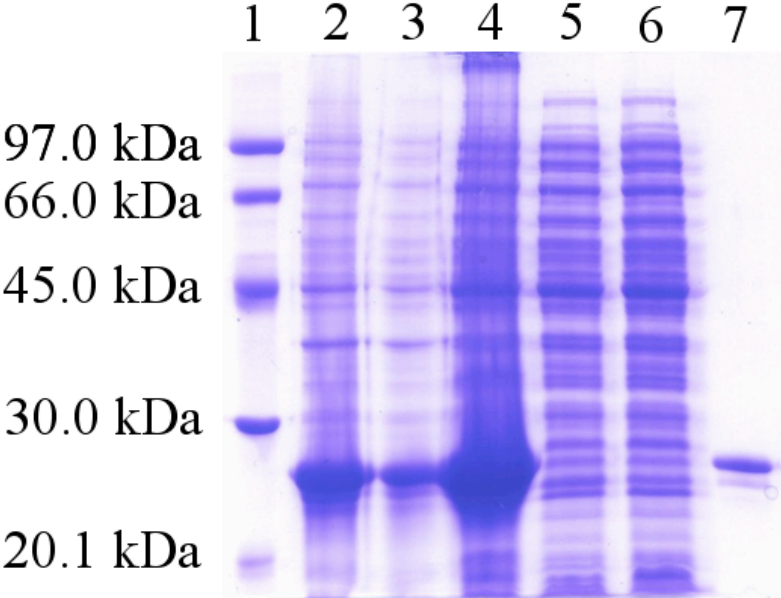

Supplementary Figure 3

UV/vis absorbance difference titration of 1-deaza-riboflavin (41  $\mu\text{M}$ ) with ppBat

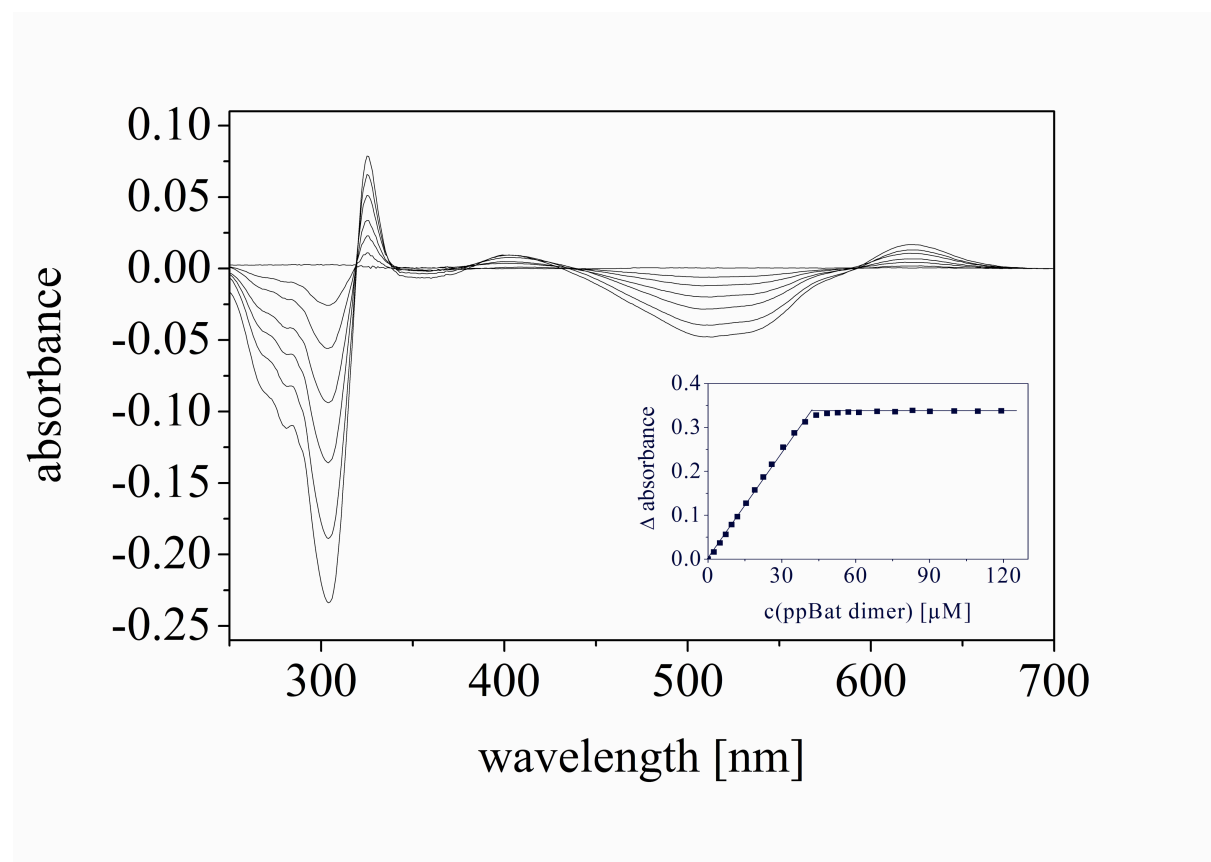

### Supplementary Figure 4

UV/vis absorbance difference titration of 2'-deoxy-riboflavin (55  $\mu\text{M}$ ) with ppBat

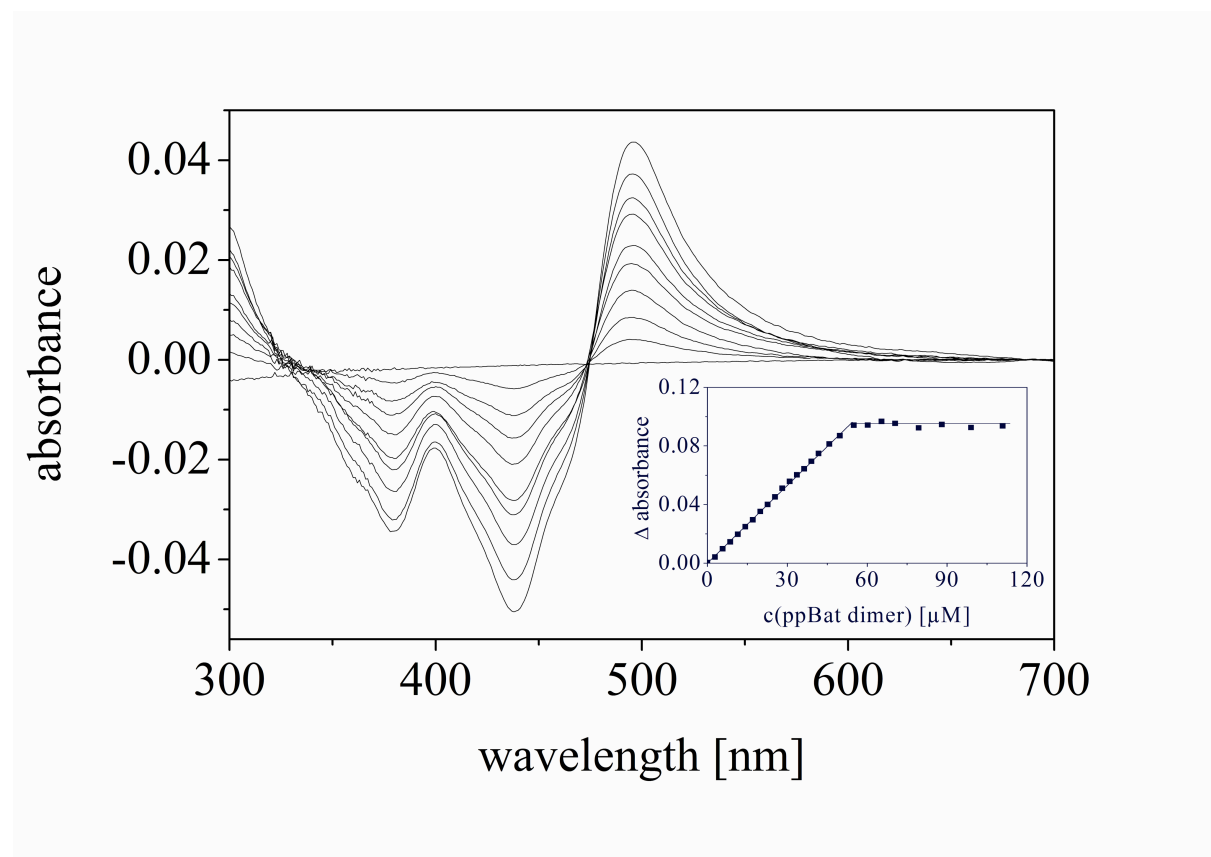

Supplementary Figure 5

ITC-determination of the dissociation constant for 2'-deoxy-riboflavin at 25 °C

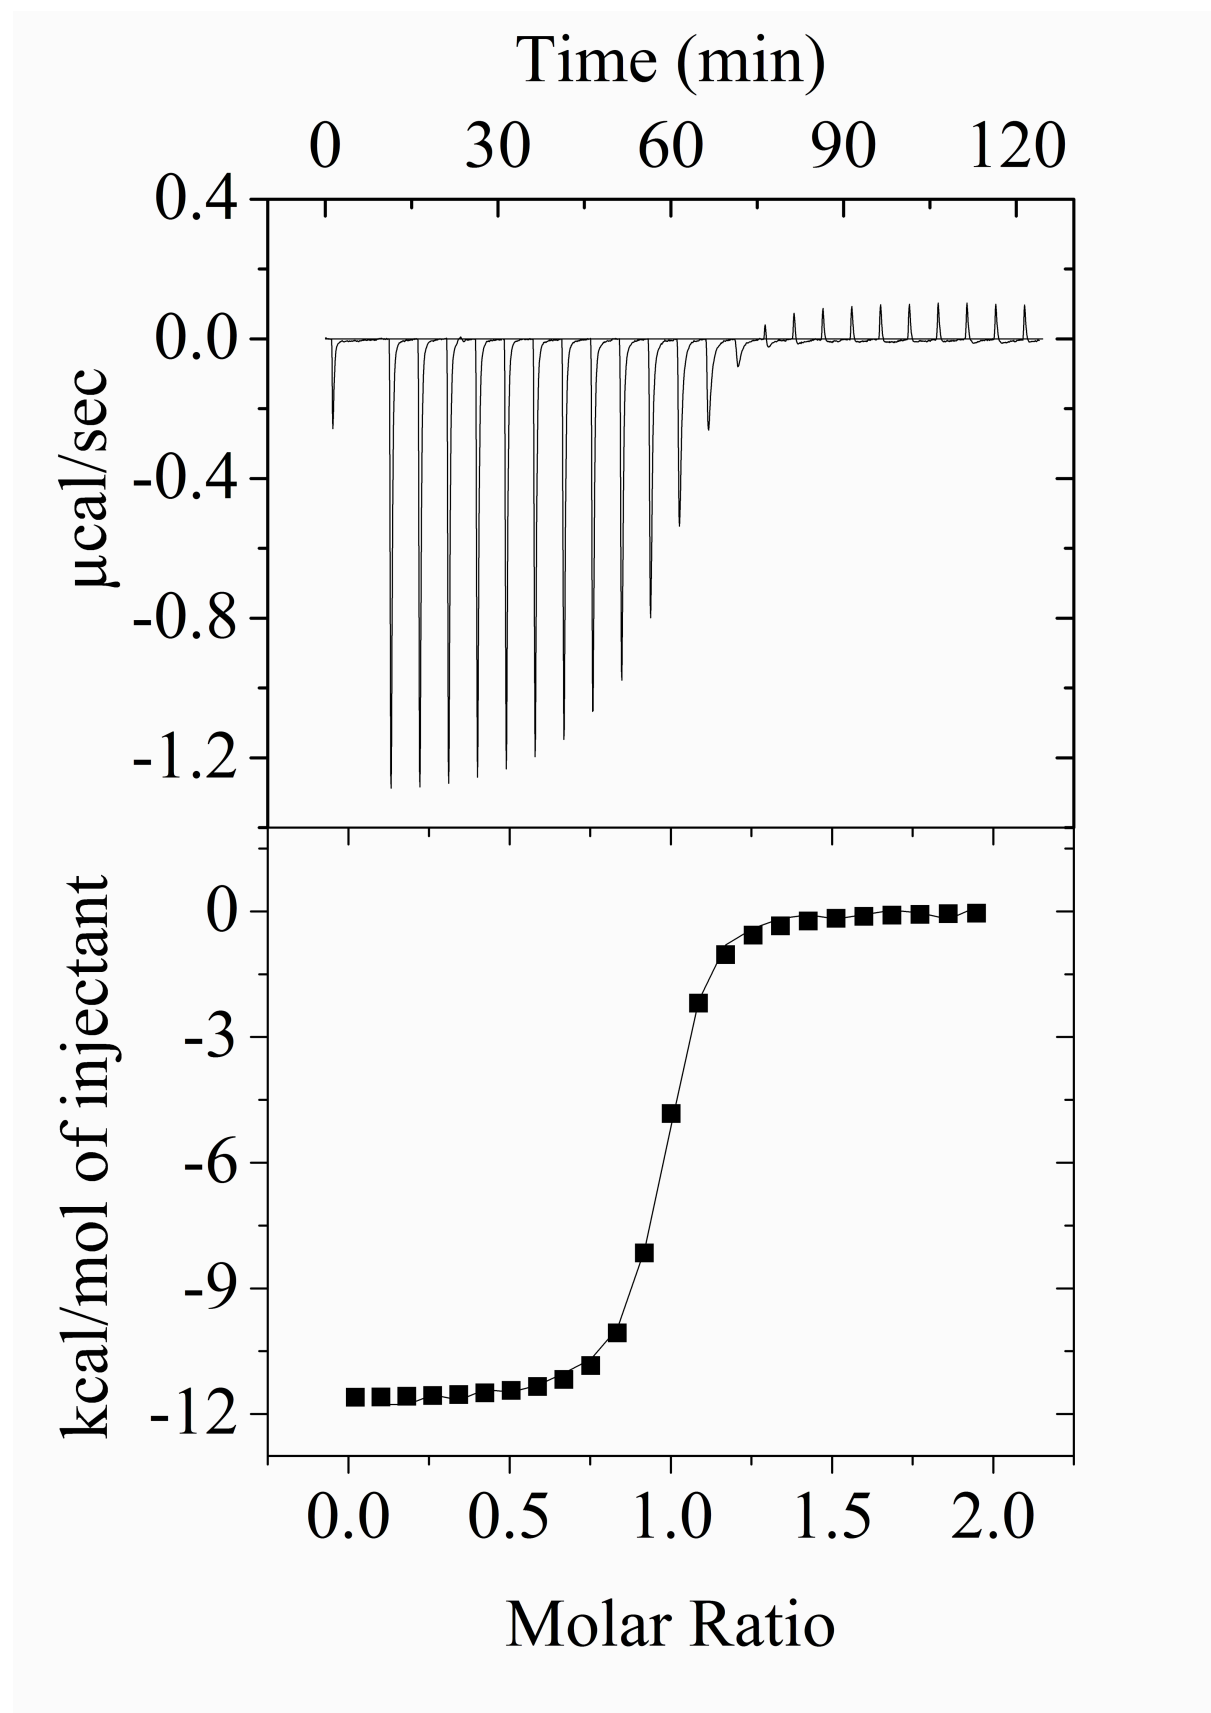

### Supplementary Figure 6

Size exclusion chromatography of ppBat (solid line), ppBat with bound FMN (dashed line), Trp164 Phe (dotted line) and the Trp164Ala (dashed-dotted line) variant.

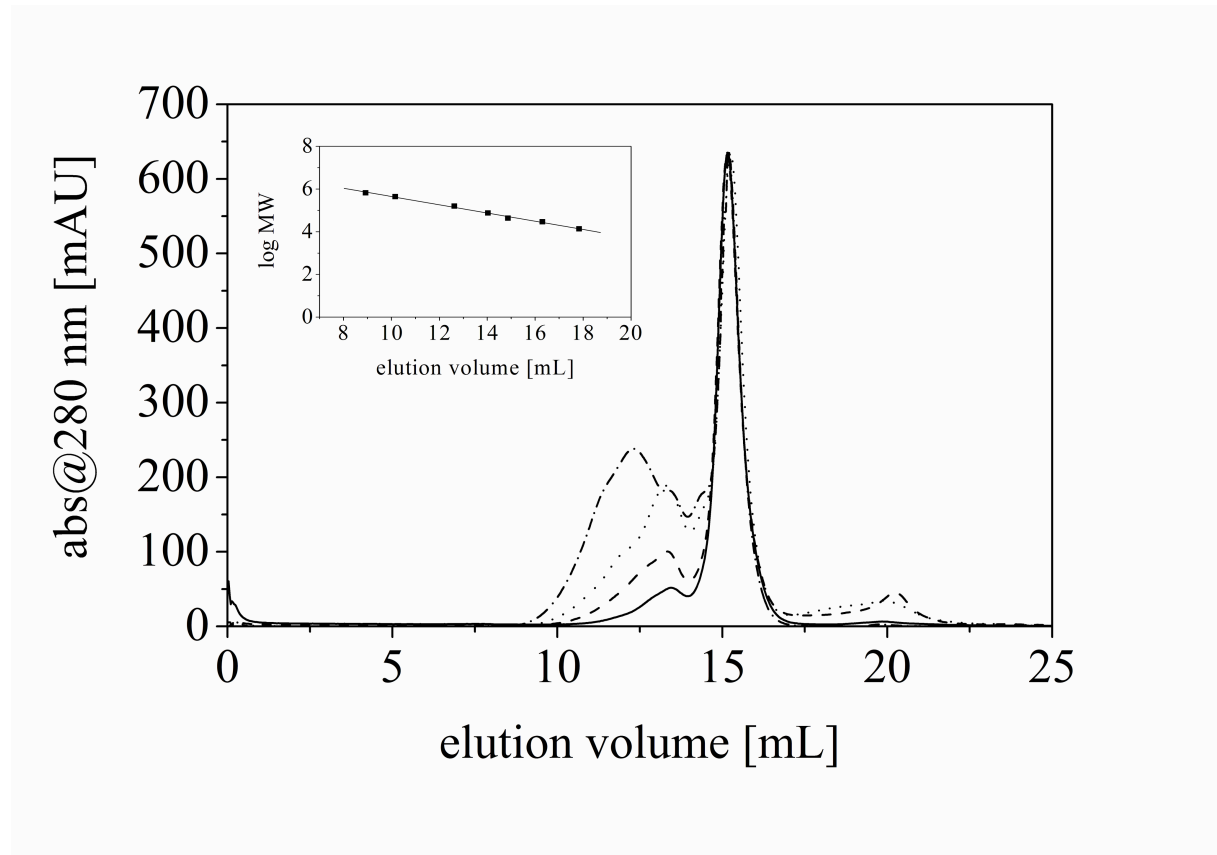

Supplement: supp_M112.355388_jbc.M112.355388-1.pdf [file supp_M112.355388_jbc.M112.355388-1.pdf]
